# Supplementary material for: Visual Detection of Stem-Loop Primer Amplification (SPA) Products without Denaturation Using Peroxidase-like DNA Machines (PxDM)
Source: MDPI journal article supplement (doi:10.3390/ijms24097812), 2023-04-25
Supplement: s1 [file s1]

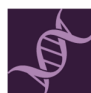

Supplementary Material

# Peroxidase-like DNA machines (PxDM) for visual detection of stem-loop primer amplification (SPA) product

Yulia I. Maltzeva <sup>1</sup>, Daria A. Gorbenko <sup>1</sup>, Ekaterina V. Nikitina <sup>2</sup>, Maria S. Rubel <sup>1,\*</sup> and Dmitry M. Kolpashchikov <sup>3,4,5</sup>

- <sup>1</sup> Laboratory of Solution Chemistry of Advanced Materials and Technologies, ITMO University, Lomonosova St. 9, 191002 St. Petersburg, Russian Federation; gorbenko@scamt-itmo.ru (D.A.G.); maltseva.yulia8@gmail.com (Y.I.M.); rubel@scamt-itmo.ru (M.S.R.)
- <sup>2</sup> Pediatric Research and Clinical Center for Infectious Diseases, Prof. Popova St. 9, St Petersburg, Russian Federation; caterina.nikitina2010@yandex.ru
- <sup>3</sup> Chemistry Department, University of Central Florida, 4000 Central Florida Boulevard, Orlando, FL 32816-2366, USA; dmitry.kolpashchikov@ucf.edu
- <sup>4</sup> Burnett School of Biomedical Sciences, University of Central Florida, Orlando, 32816 Florida, USA
- <sup>5</sup> National Center for Forensic Science, University of Central Florida, Orlando, FL, USA
- \* Correspondence: rubel@scamt-itmo.ru (M.S.R.)

## Table of content:

1. Oligonucleotides used in this study.
2. Analysis of EBV amplification products

## S1. Material and Methods

Table S1. Sequence of primers

| Oligonucleotide name | Sequence 5'-3'                             |
|----------------------|--------------------------------------------|
| PCR E.coli primers   |                                            |
| F3                   | GCCATCTCCTGATGACGC                         |
| B3                   | ATTACCGCAGCCAGACG                          |
| LAMP E.coli primers  |                                            |
| FIP                  | CTGGGGCGAGGTCGTCCTATTCCGACAAACACCACGAATT   |
| BIP                  | CATTTTGCAGCTGTACGCTCGCAGCCCATCATGAATGTTGCT |
| F3                   | GCCATCTCCTGATGACGC                         |
| B3                   | ATTACCGCAGCCAGACG                          |
| SPA E. coli primers  |                                            |
| FrSL_AA              | TTTATATAATATATAAAAGGTTGTTACAAAGG           |
| BvSL_AA              | TTTATATAATATATAAACGACCTCGCCC               |
| FrSL_CC              | CCTATATAATATATAGGAGGTTGTTACAAAGG           |
| BvSL_CC              | CCTATATAATATATAGGCGACCTCGCCC               |
| Fr                   | AGGTTGTTACAAAGG                            |
| Bv                   | CGACCTCGCC                                 |

| SPA <i>St. agalactiae</i> primers |                                         |
|-----------------------------------|-----------------------------------------|
| Sagal_Fr                          | CCGGTAGAGCTATTACC                       |
| Sagal_Bv                          | AATGTGTTATCCCACTTC                      |
| Sagal_FrSL                        | TTTATATAATATATAAAA CCGGTAGAGCTATTACC    |
| Sagal_BvSL                        | TTTATATAATATATAAAA AATGTGTTATCCCACTTC   |
| SPA Epstein-Barr virus primers    |                                         |
| EBV_Frw                           | GTCTCGCCGGACTATGGCCT                    |
| EBV_Rw                            | TGTTCCAGCCACCCGCCATC                    |
| EBV_FrwSL                         | TTTATATAATATATAAAA GTCTCGCCGGACTATGGCCT |
| EBV_RwSL                          | TTTATATAATATATAAAA TGTTCCAGCCACCCGCCATC |

**Table S2. Sequence of the PxDMs**

| Oligonucleotide name | Sequence 5'-3'                                                                                                                                                                             |
|----------------------|--------------------------------------------------------------------------------------------------------------------------------------------------------------------------------------------|
| Target E.coli DNA    | ATAGTCAGCCCATCATGAATGTTGCTGTCGATGACAGGTTGT<br>TACAAAGGGAGAAGGGCATGGCGAGCGTACAGCTGCAAAA<br>TGTAACGAAAGCCTGGGGCGAGGTCGTGGTATCGAAAGATA<br>TCAATCTCGATATCCATGAAGGTGAATTCGTGGTGTGTTGTCG<br>GACC |
| Target EBV DNA       | TGGGCGGGCGTCTCGCCGGACTATGGCCTCGGCACGCTCGG<br>CGTCGATGGCGGGTGGCTG<br>GAACAGGCGGGCGAATGTGTAATCCCGGA                                                                                          |
| E.coli PxDM T1       | CATATAAGGAATAGCAGAAGGCGGCTAG/HEG/CGTTACATT<br>TTGCA/HEG/ <b>GGGTAGGG</b>                                                                                                                   |
| E.coli PxDM T2       | GACCTCGCCCCAGGCTTT/HEG/CTAGCCGCCTTCTGCTATTC<br>CTTATATG/HEG/TGCCCTTCTCCCTTTGTAA                                                                                                            |
| E.coli PxDM F7       | <b>GGGTTGGG</b> /HEG/GCTGTACGCTCGCCAACC                                                                                                                                                    |
| F7 SNP               | <b>GGGTTGGG</b> /HEG/GCTGTAC <b>A</b> CTCGCCAACC                                                                                                                                           |
| EBV PxDM f7          | <b>GGGTAGGG</b> tttt GCGTGCCGAGGCcc                                                                                                                                                        |
| EBV PxDM T1          | ATTCGTAATGCTGACTAGATAGATttttccCGCCATCGACGCCGA<br>tttt <b>GGGTTGGG</b>                                                                                                                      |
| EBV PxDM T2          | TGTTCCAGCCACCtttttATCTATCTAGTCAGCATTACGAATttttC<br>ATAGTCCGGCGAGAC                                                                                                                         |

/HEG/- hexaethylene glycol linkers. Nucleotide linkers between different functional parts of PxDM are shown in low case. Bold nucleotides form G-quadruplex. Sequences of synthetic analytes corresponded to the sequences of amplicons. Red letter is a mismatched nucleotide introduced to the sensing arm of the sensor.

### 3. Analysis of EBV amplification products

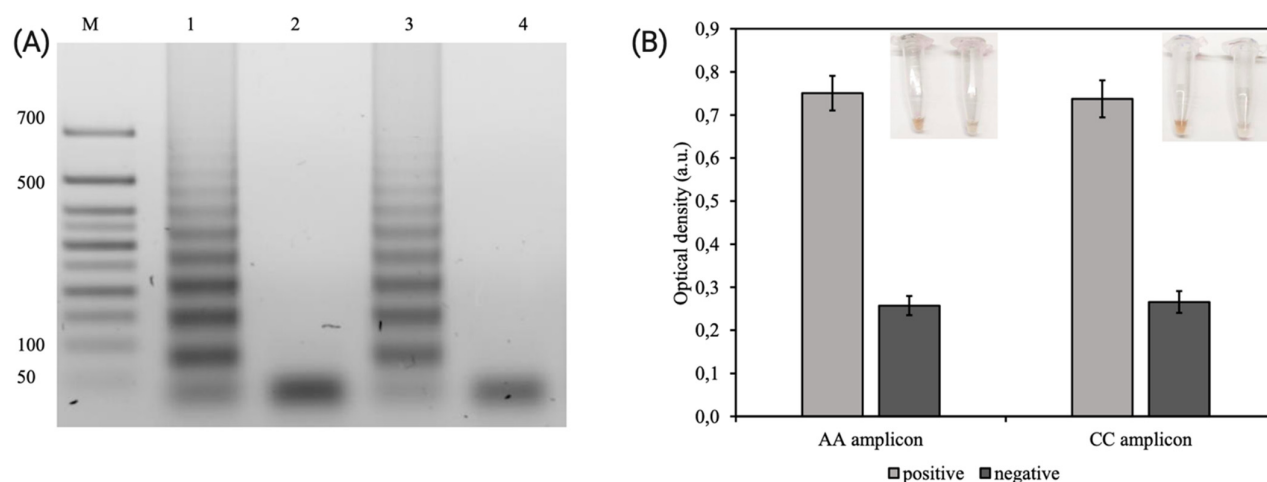

**Figure S1.** (A) An analysis of the EBV amplification products in 2% agarose. Analysis of Epstein-Barr virus amplicons obtained with AA and CC Epstein-Barr virus primers: M – marker 50 bp+, 1 – AA Epstein-Barr virus primers, 3 – CC Epstein-Barr virus primers, 2 and 4 – negative controls. (B) Analysis of Epstein-Barr virus amplicons obtained with AA and CC Epstein-Barr virus primers by Epstein-Barr virus PxDM. Colorimetric analysis of reaction buffer in the presence (positive) or absence (negative) of 300 ng of purified SPA product. Strand concentrations: 1  $\mu$ M of T1, 1  $\mu$ M of T2, 1  $\mu$ M of F7. Inset: The corresponding photograph of the color change.
